# Supplementary material for: Associations of childhood, adolescence, and midlife cognitive function with DNA methylation age acceleration in midlife
Source: publisher site journal article supplement (doi:10.18632/aging.205943), 2024-06-13
Supplement: Supplementary file [file aging-v16i11-205943-supplementary-material-SD1.pdf]

## SUPPLEMENTARY FIGURES

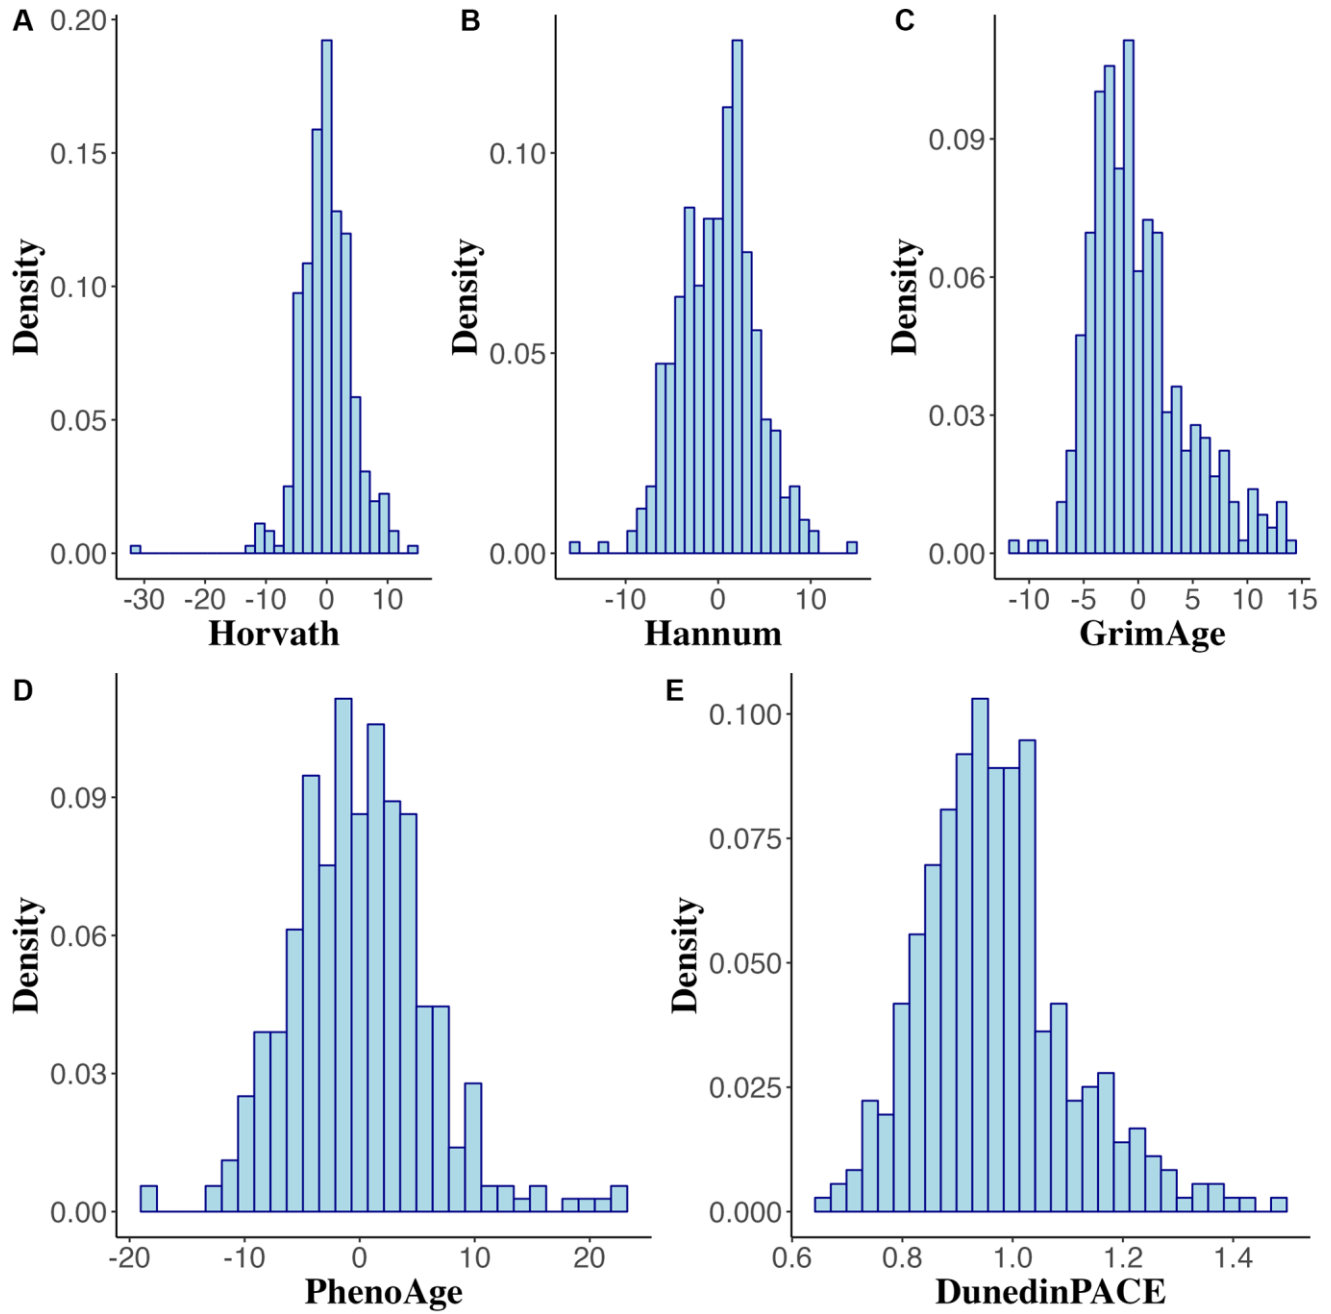

**Supplementary Figure 1.** Distribution of DNA methylation age acceleration measures in midlife, including (A) Horvath, (B) Hannum, (C) GrimAge, (D) PhenoAge, (E) DunedinPACE.

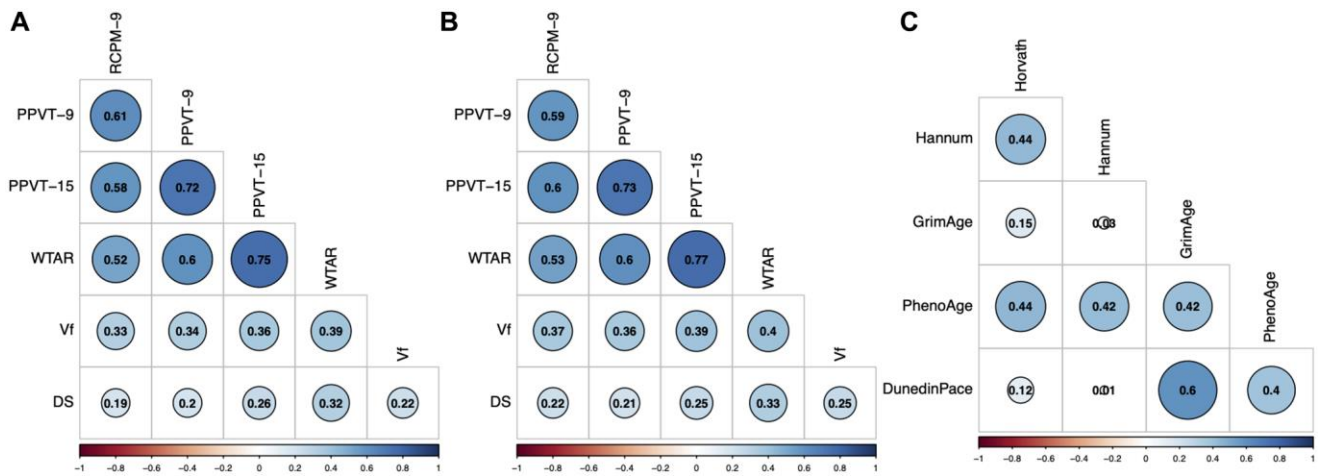

**Supplementary Figure 2.** Heatmaps showing correlations between adolescent cognitive function measures (A) before (participants without missing values in any cognitive function measure,  $n = 269$ ) and (B) after multiple imputation ( $n = 359$ ), and (C) between midlife DNA methylation age acceleration measures ( $n = 359$ ).

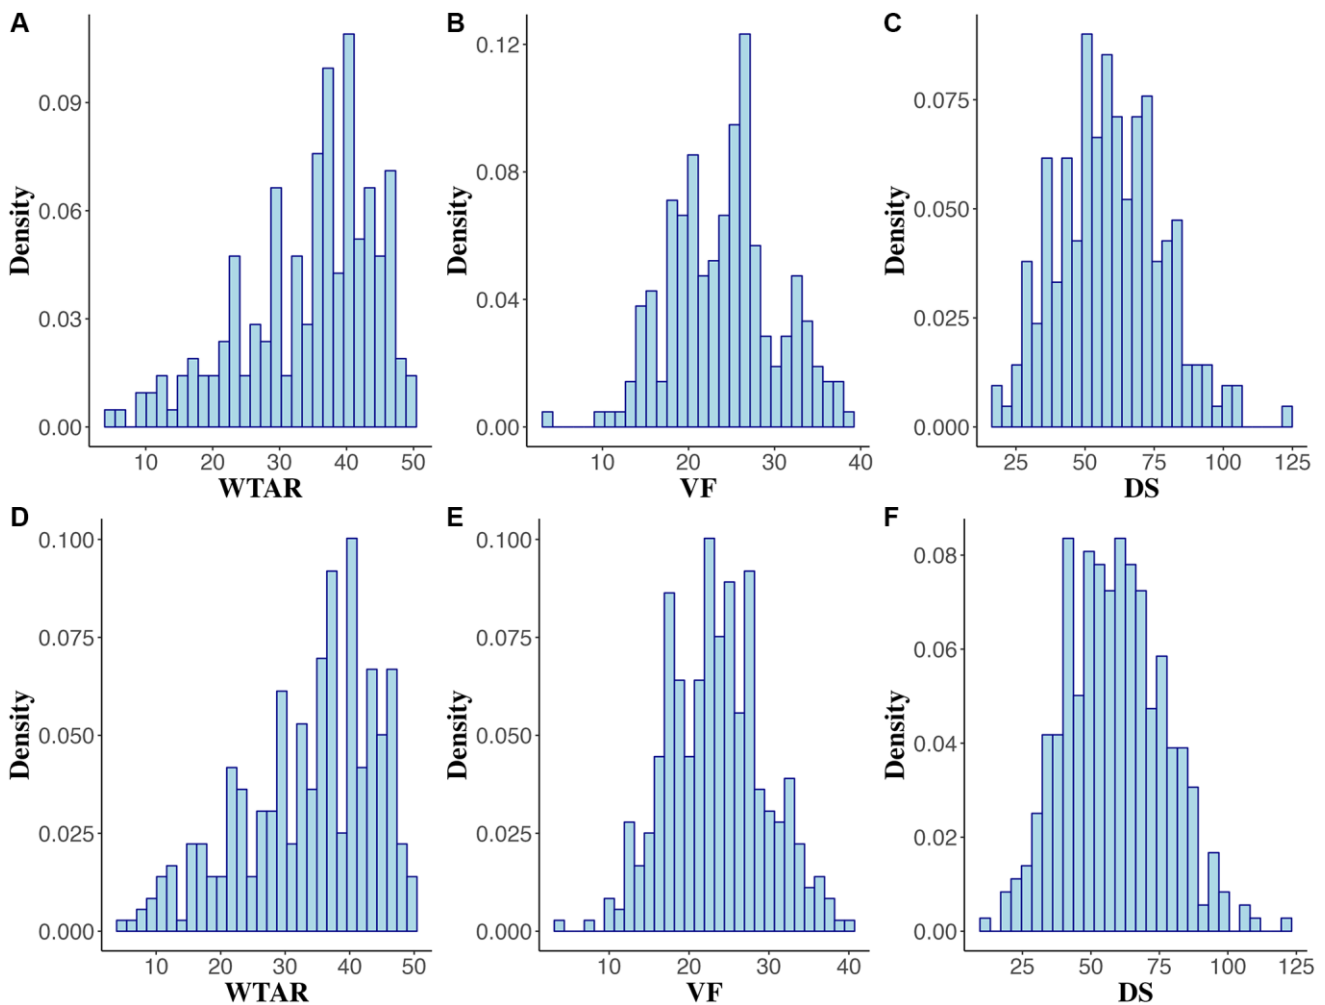

**Supplementary Figure 3. Distributions of cognitive function in midlife.** These include (A) Wechsler Test of Adult Reading (WTAR), (B) Verbal Fluency (VF), (C) Digit Symbol (DS) before multiple imputation ( $n = 211$ ) and (D) WTAR, (E) VF, (F) DS after multiple imputation ( $n = 359$ ).

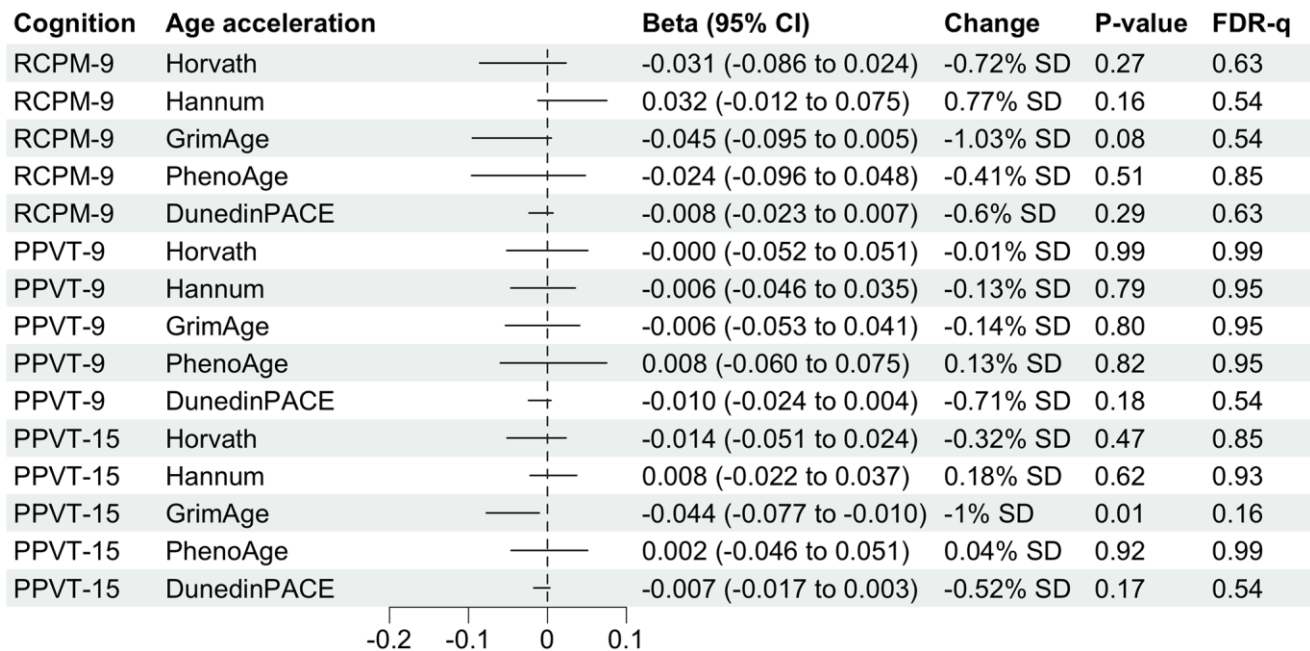

**Supplementary Figure 4. Sensitivity analyses of the associations between childhood/adolescent cognitive function and midlife DNA methylation age accelerations by complete case analysis ( $n = 286$ ).** Betas multiplied by 10 were shown for associations with DunedinPACE for better visualization. Column “Change” is showing that 1-unit change in childhood or adolescent cognitive function is associated with X.XX% standard deviation (SD) change in DNA methylation age acceleration. SD for each DNA methylation age can be found in Table 1.

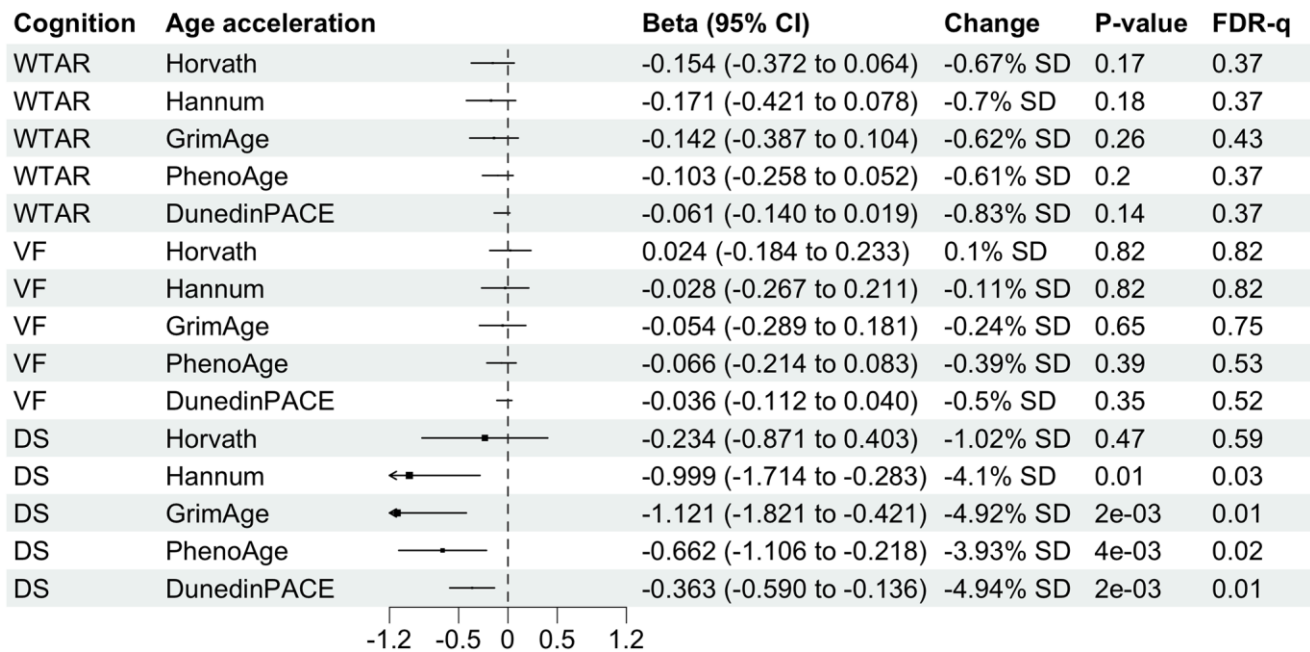

**Supplementary Figure 5. Sensitivity analyses of the associations between midlife cognitive function and midlife DNA methylation age accelerations by complete case analysis ( $n = 211$ ).** Betas divided by 100 were shown for associations with DunedinPACE for better visualization. Column “Change” is showing that 1-standard deviation (SD) change in DNA methylation age acceleration is associated with X.XX-unit change in midlife cognitive function. SD for each DNA methylation age can be found in Table 1.

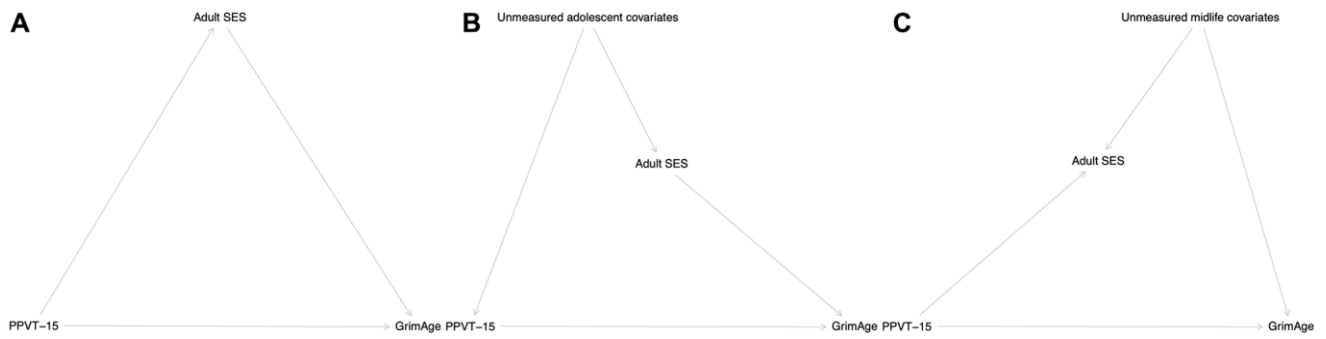

**Supplementary Figure 6. Directed acyclic graphs (DAGs) for possible causal relationship between adolescent cognitive function, Adult SES and midlife DNA methylation age acceleration.** (A) SES is a mediator. (B) SES is associated with confounders. (C) SES is a collider.

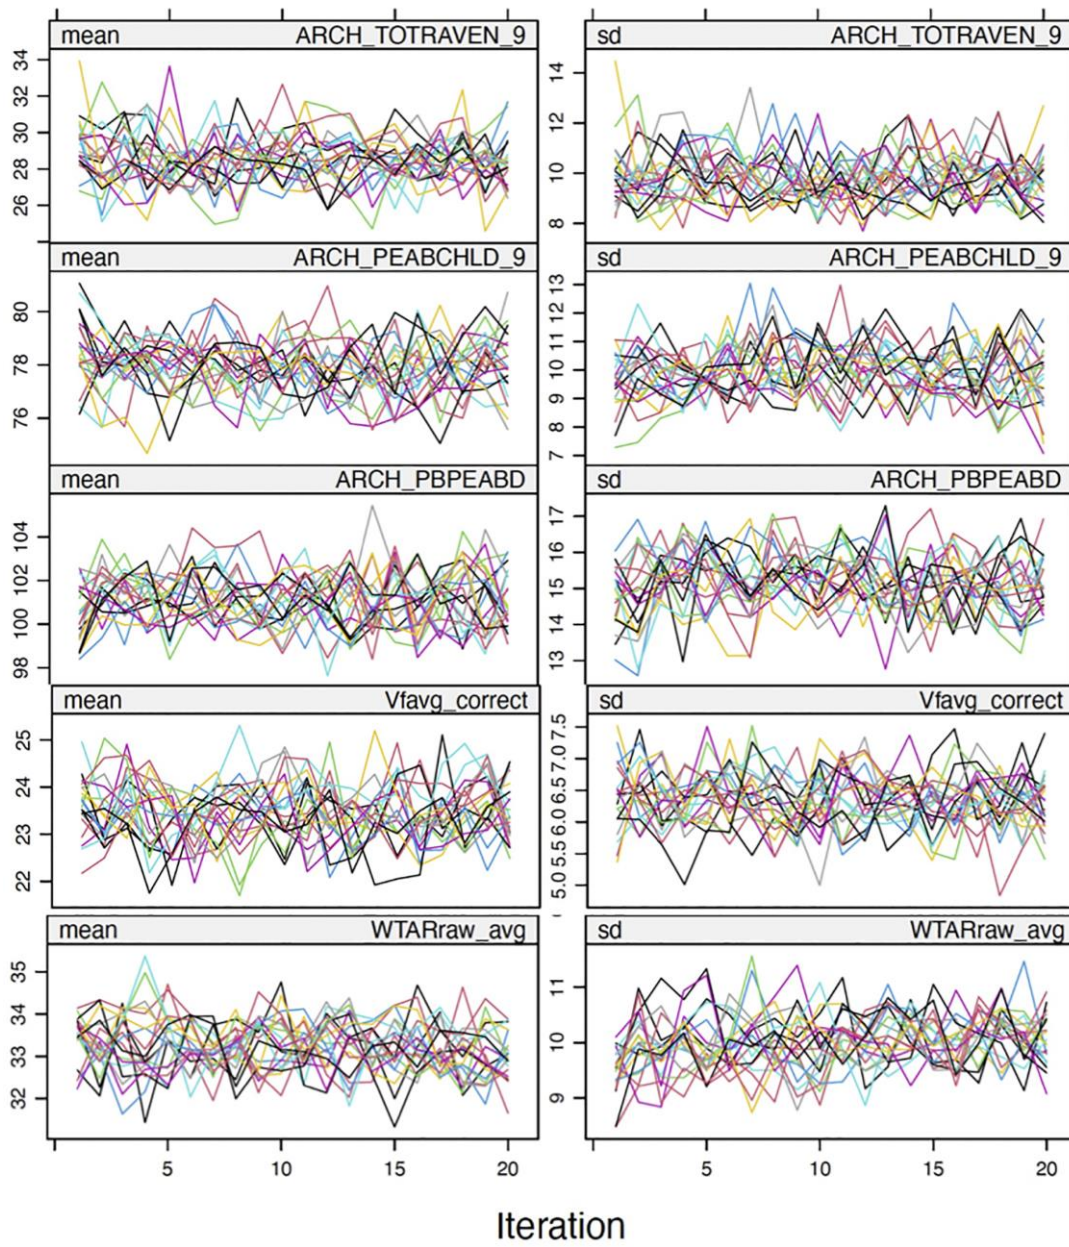

**Supplementary Figure 7. Traces of convergence of cognitive function measures in multiple imputation algorithm.**

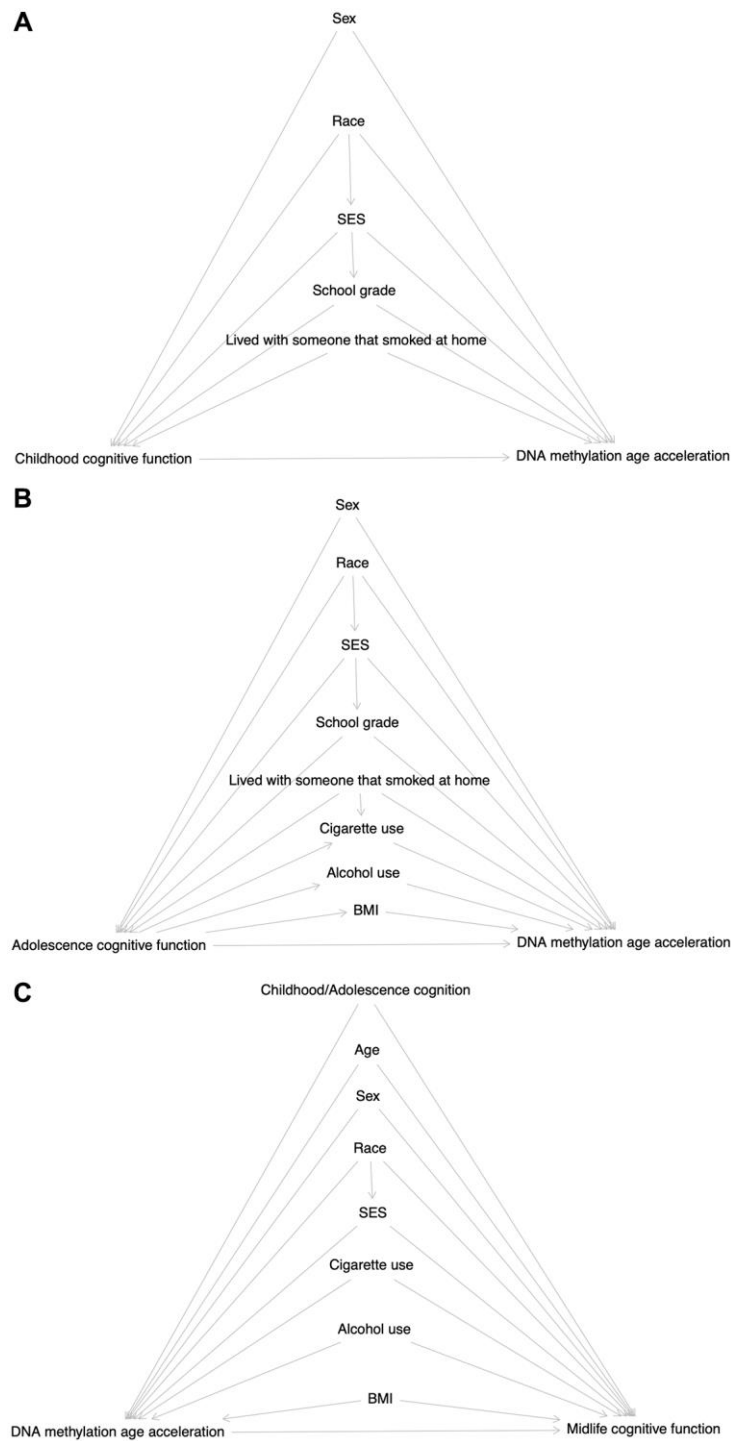

**Supplementary Figure 8.** Directed acyclic graphs (DAGs) conceptualizing the causal relationships between (A) childhood, (B) adolescence, (C) midlife cognitive function and midlife DNA methylation age accelerations.
